# Supplementary material
Source: Springer Nature journal article supplement (https://www.springermedizin.de/resource/supplementary/12879_2011_1605_MOESM3_ESM.pdf/9442918)

Geometric mean titer  
(GMT)

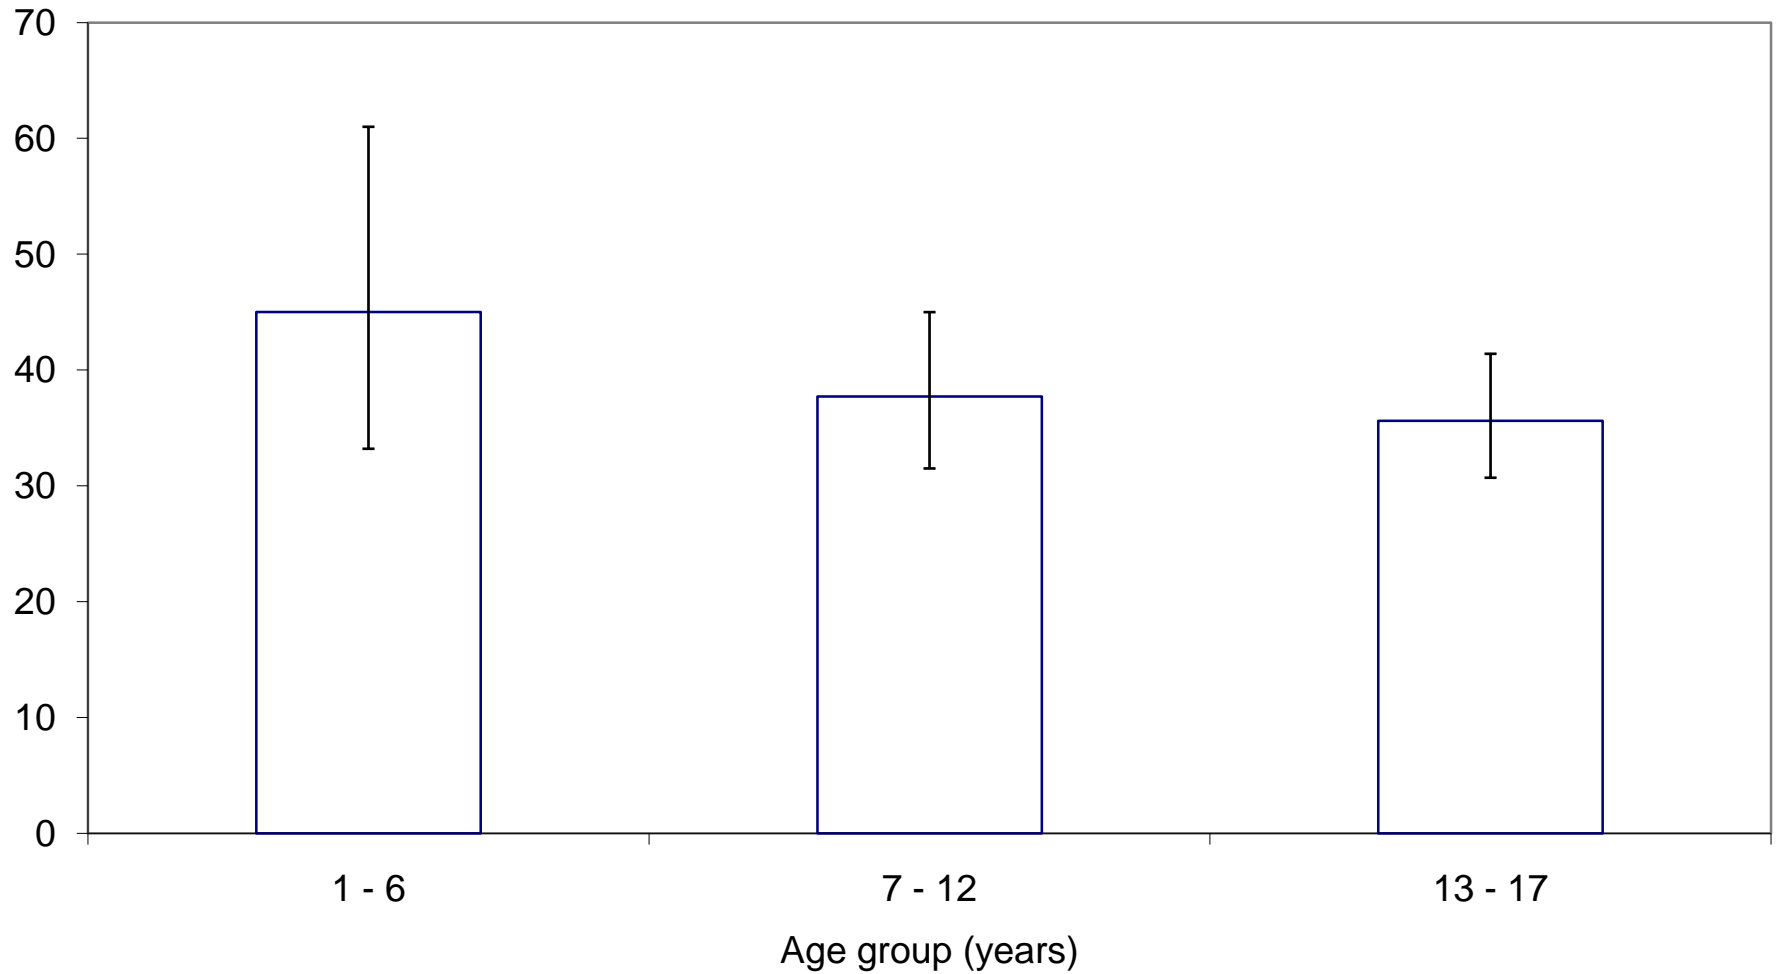

Supplement: MOESM3 [file 9442918]
